# Supplementary material for: Characterizing cell-type spatial relationships across length scales in spatially resolved omics data
Source: PubMed Central journal article supplement (PMC11699133; doi:10.1038/s41467-024-55700-1), 2025-01-03
Supplement: 41467_2024_55700_MOESM2_ESM.pdf [file 41467_2024_55700_MOESM2_ESM.pdf]

## **Description of Additional Supplementary Files:**

**Supplementary Software 1:** the CRAWDAD R Package
